# Supplementary material for: An adaptive genetic algorithm for selection of blood-based biomarkers for prediction of Alzheimer's disease progression
Source: PubMed Central journal article supplement (PMC4682419; doi:10.1186/1471-2105-16-s18-s1), 2015-12-09
Supplement: 1471-2105-16-S18-S1-S5.pdf [file 1471-2105-16-S18-S1-S5.pdf]

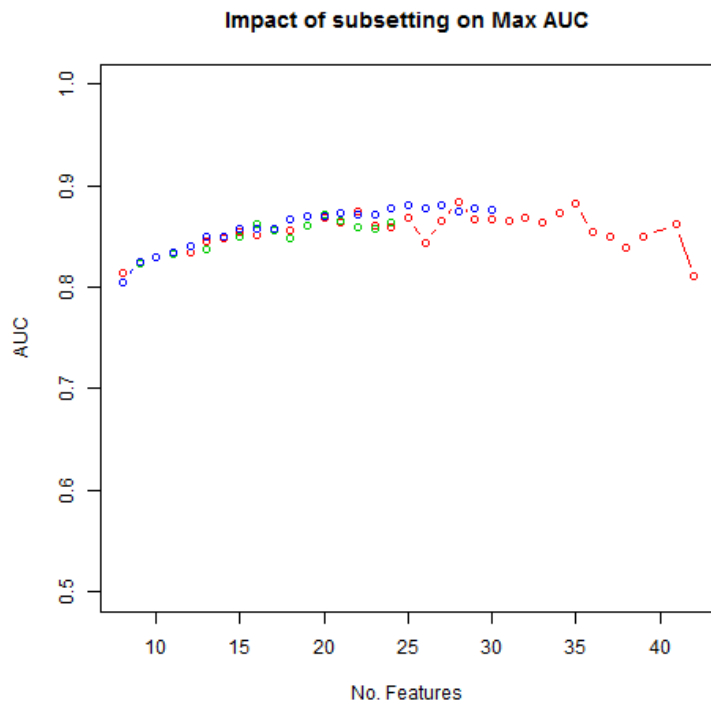

Figure S2: Comparison of AUC with best 5% (red), and previous best half (green) and best quartile (blue) subsetting
